# Supplementary material for: Synergistic effect on BCN nanomaterials for the oxygen reduction reaction – a kinetic and mechanistic analysis to explore the active sites
Source: Royal Society of Chemistry journal article supplement (doi:10.1039/d0cy00911c), 2020-01-01
Supplement: d0cy00911c1.pdf [file d0cy00911c1.pdf]

## Supporting Information

### **Synergistic effect on BCN nanomaterials for the oxygen reduction reaction– A kinetic and mechanistic analysis to explore the active sites**

E.A. Anook Nazer and Azhagumuthu Muthukrishnan\*

\*School of Chemistry, Indian Institute of Science Education and Research Thiruvananthapuram,  
Maruthamala (P.O), Vithura-695551, Kerala, India

Email: [muthukrishnan@iisertvm.ac.in](mailto:muthukrishnan@iisertvm.ac.in)

## Materials

Graphite powder (>99) and sodium nitrate (99.99%) were purchased from Sigma Aldrich. Sulphuric acid (98%), potassium permanganate (98.5%), hydrogen peroxide (30%), hydrochloric acid (37%) and boric acid (99.99%) were obtained from Merck. Dicyandiamide (>98%) was obtained from TCI.

## Powder X-ray Diffraction spectroscopy

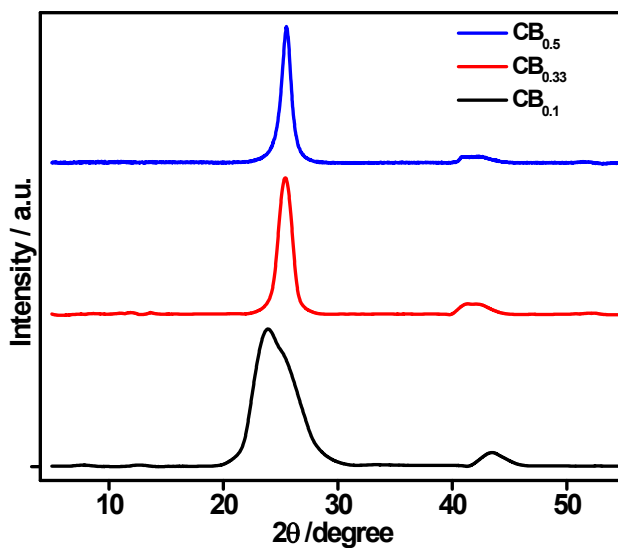

**Figure S1.** PXRD pattern of B-rGO compounds at various initial boron content.

## Chracterization

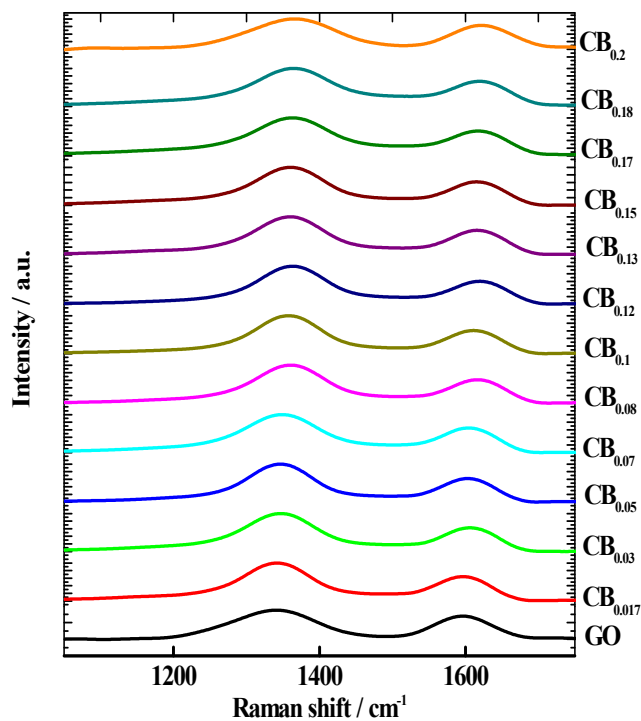

**Figure S2.** Raman spectra of B-rGO compounds at the various initial boron contents compared with the GO.

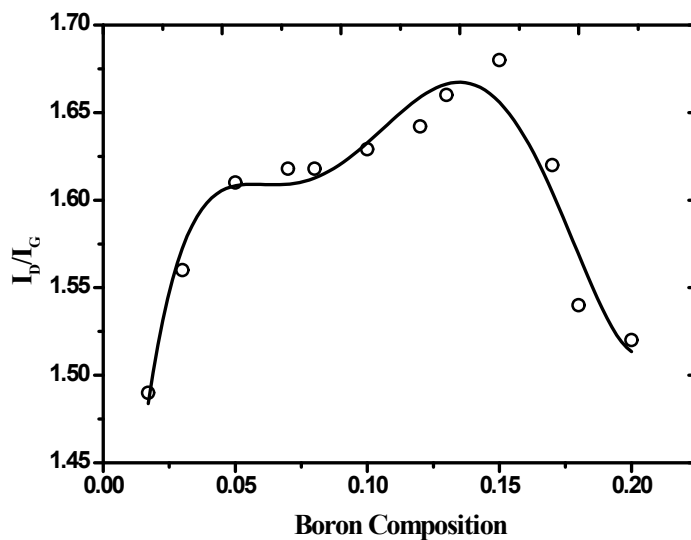

**Figure S3.** Initial boron content (numbers in the x-axis indicate the fraction of the boron reference to the carbon, example  $\text{C} : \text{B} = 1:n$ , where  $n$  represents the values in the x-axis).solid line indicates the polynomial fitting (5<sup>th</sup> order) of the values.

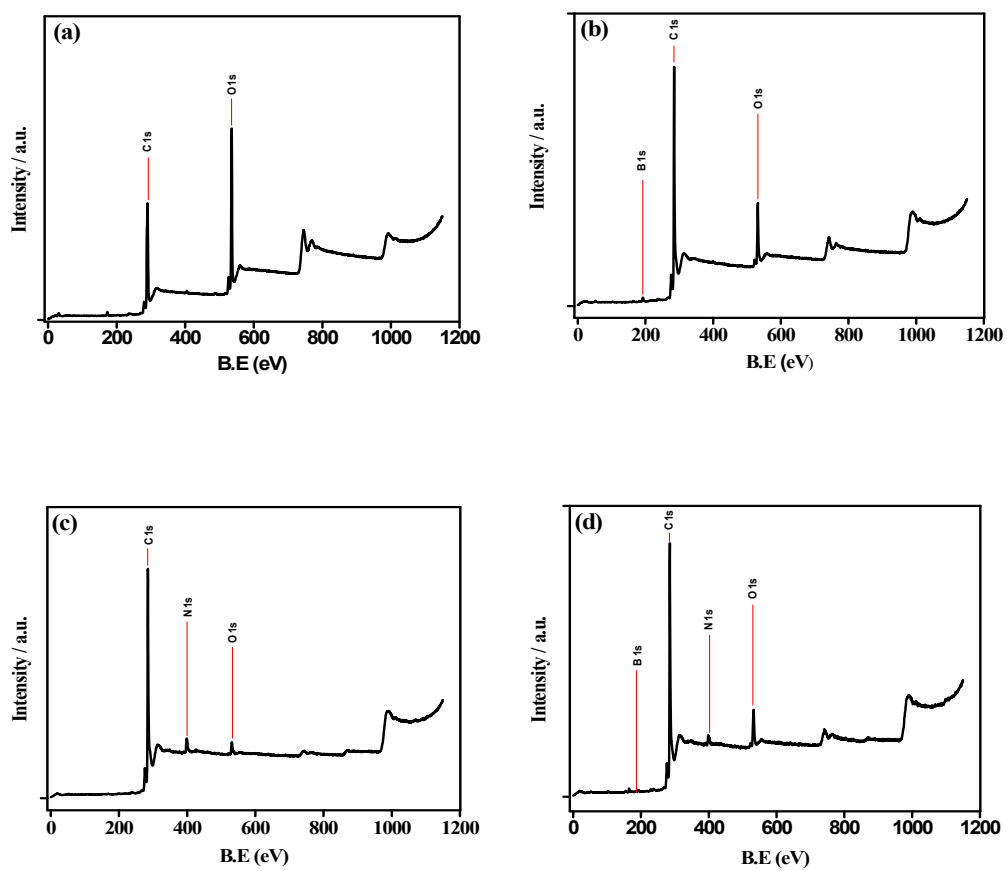

**Figure S4.** XPS survey spectra of the compounds (a) GO, (b) B-rGO, (c) N-rGO and (d) B&N-rGO.

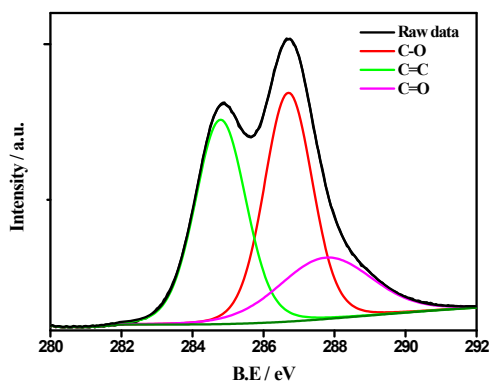

**Figure S5.** Core level C-1s XPS spectrum of GO, deconvoluting into various oxygen functionalities.

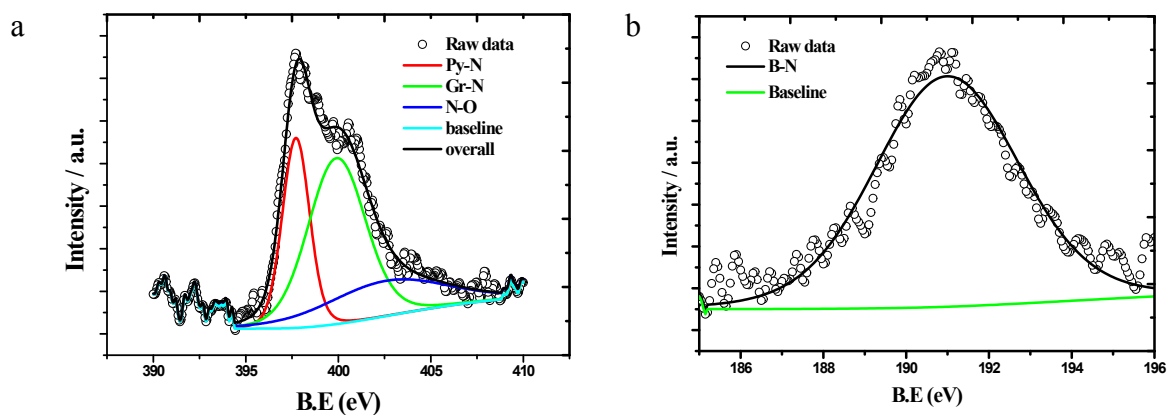

**Figure S6.** Core level (a) N-1s and (b) B-1s XPS spectra of the B-rGO+N-rGO

The existence of the B and N is observed in the physical mixture of 1:1 ratio B-RGO and N-RGO compounds. The shift in the N-1s spectra to the low binding energy side is observed due to the interaction with the electropositive element (Boron) demonstrated the existence of the B-N interaction. In the physical mixture, the Py-N and Gr-N peaks are appeared at 397.7 eV and 399.9 eV, respectively. This is 0.3 to 0.4 eV shift from the values observed for B&N-RGO and N-RGO. Besides, the B-1s spectra shifts to the higher binding energy (191.0 eV) compared with the B&N-RGO (189.4 eV), indicating the interaction of boron with the higher electronegative element, i.e. nitrogen. The formation of chemical

bonds between B and N could shift the peak to the larger extent. Rao et al. [Panchakarla, Adv. Mater., 2009, **21**, 4726-4730] reported the formation of the B-N bonds during the copolyrolysis of activated charcoal with boric acid and urea. The deconvoluted N-1s peak at 397.1 eV corresponds to B-N bond, which is approximately 1 eV shift from the normal C-N (pyridinic nitrogen) bond. Hence the physical mixture of B-rGO and N-rGO does not have any chemical bonds. Also, the B-rGO and N-rGO were synthesised separately, the B and N present in two different layers of graphene. Hence, The B-rGO and N-rGO may interact due to their electronegativity difference in the uniformly dispersed solution.

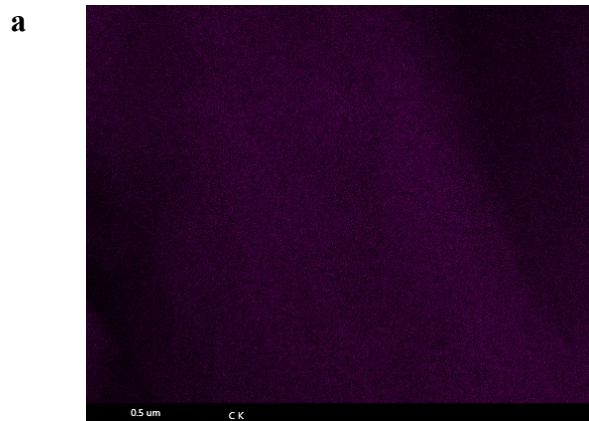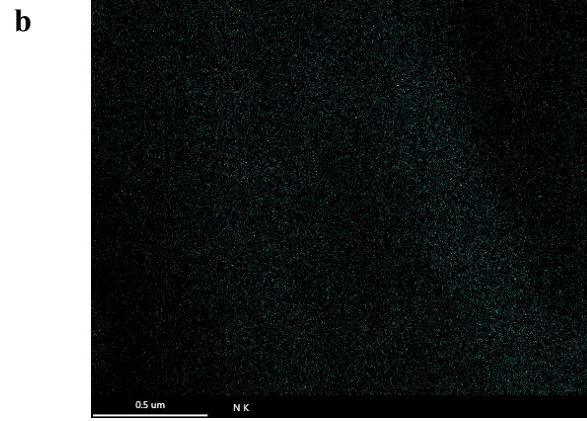

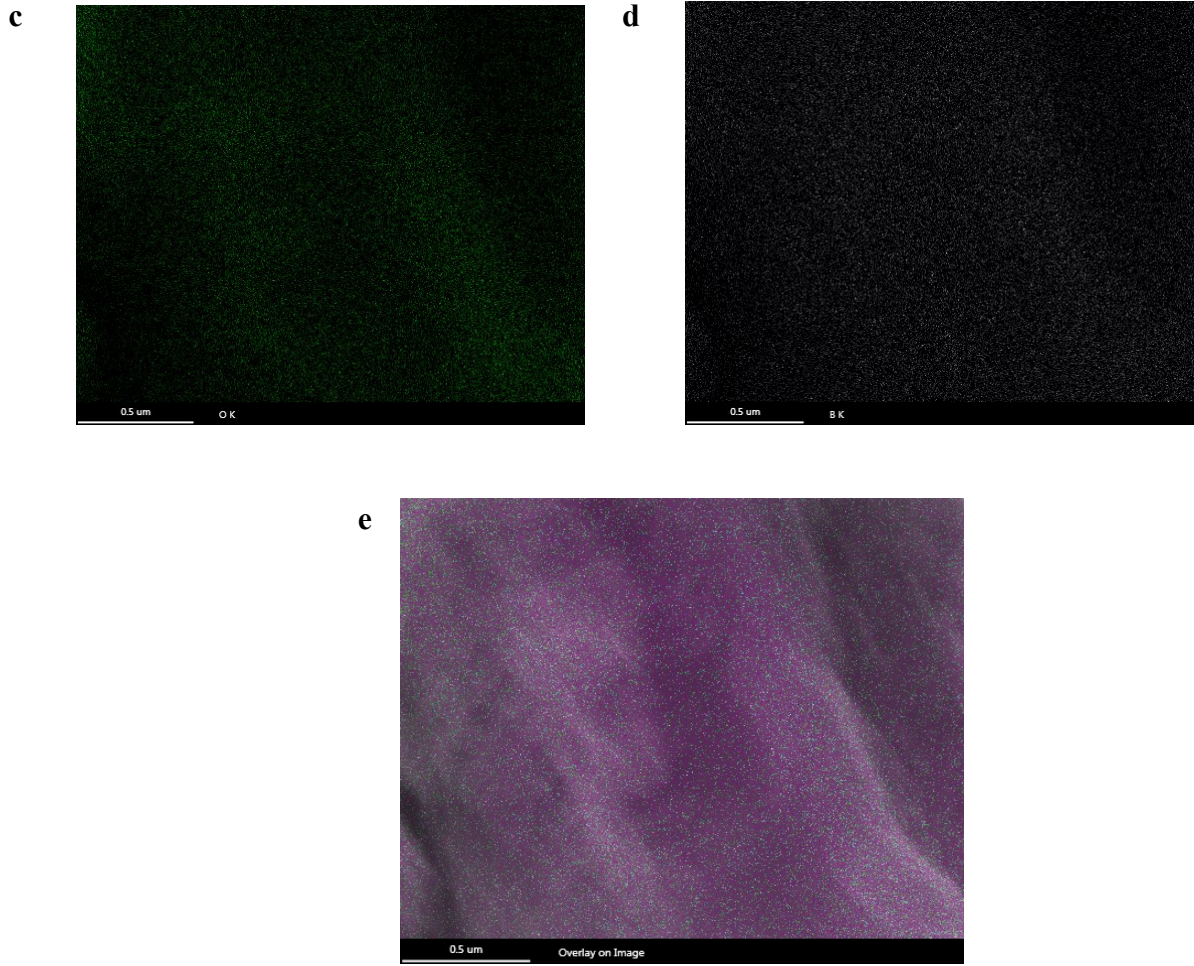

**Figure S7.** Elemental mapping of individual atoms present in the B&N-rGO are shown for the elements C (a), N (b), O (c), B (d) and overlap of all the above (e).

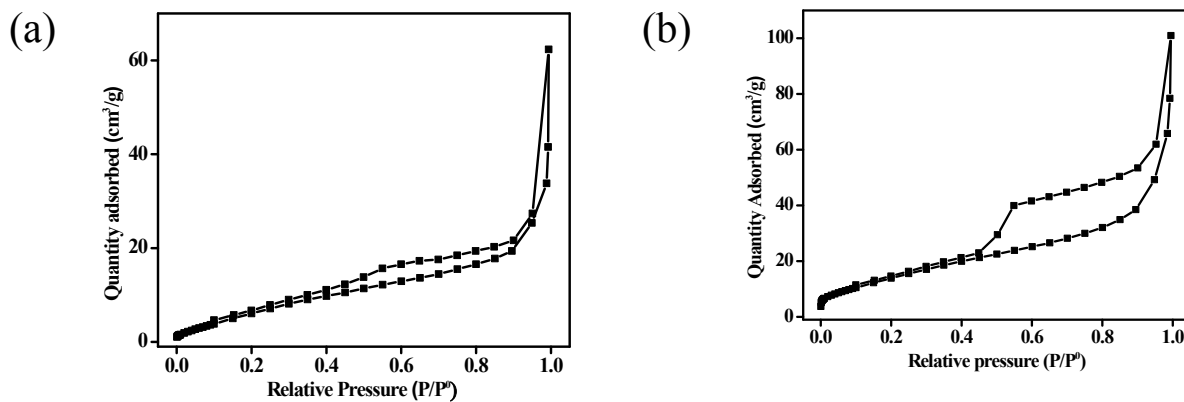

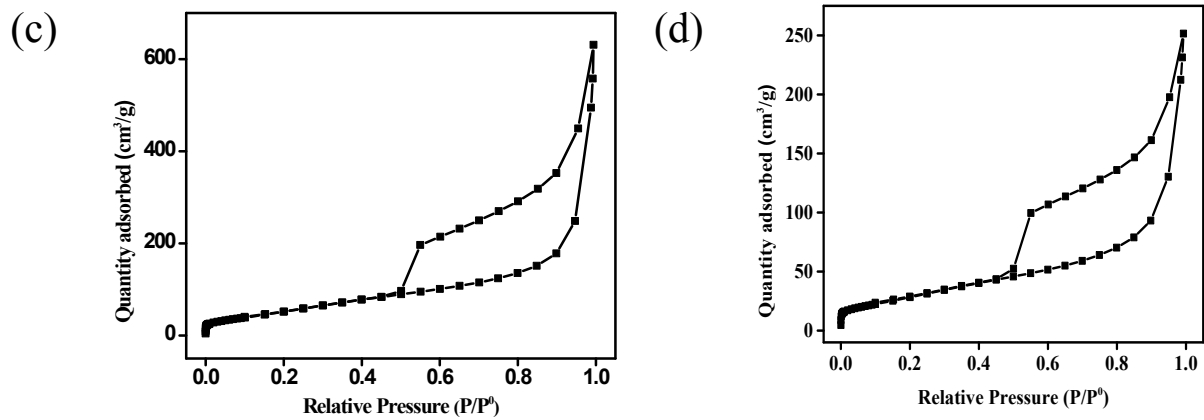

**Figure S8.** BET isotherms of (a) GO, (b) B-rGO, (c) N-rGO and (d) B&N-rGO

Electrochemistry



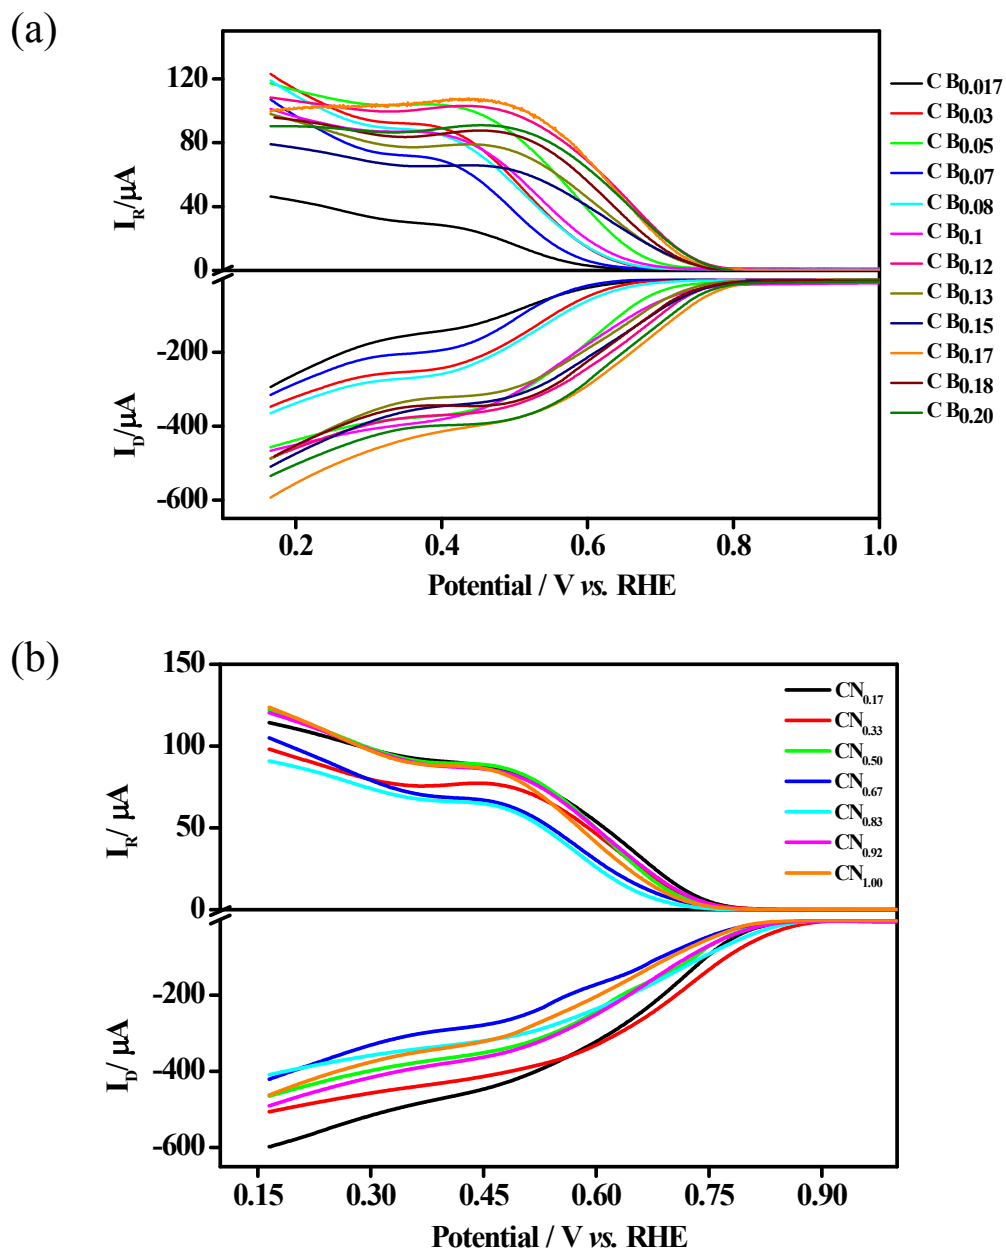

**Figure S9.** RRDE voltammograms for the ORR on (a) B-rGO and (b) N-rGO at various amounts of initial boron and nitrogen precursor at O<sub>2</sub>-saturated 0.1 M KOH.

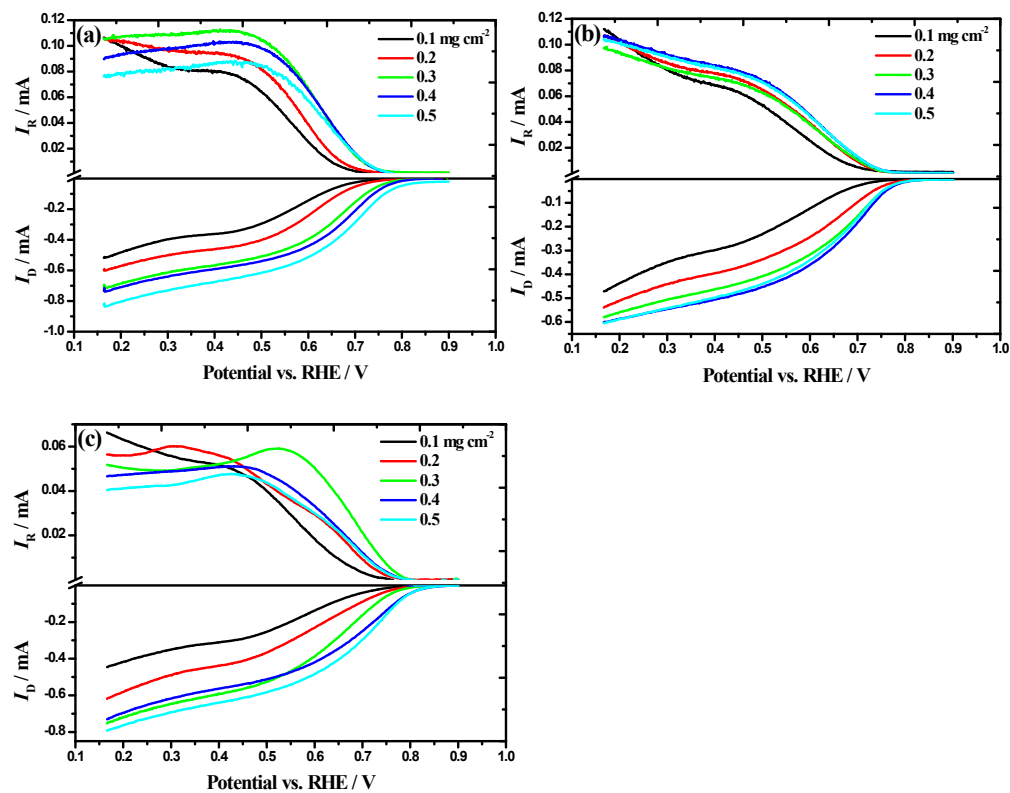

**Figure S10.** RRDE voltammograms of the ORR on (a) B-rGO, (b) N-rGO and (c) B&N-rGO catalysts at various loading densities. The rotation speed is 1600 rpm, and at the scan rate of 10 mV/sec.

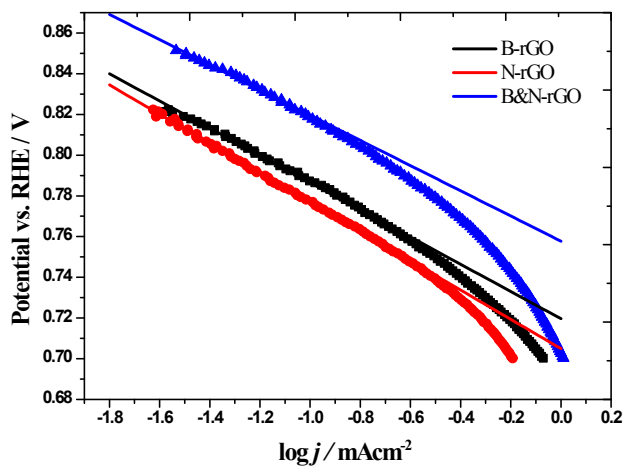

**Figure S11.** Tafel plots of the ORR on B-rGO, N-rGO and B&N-rGO. The Current densities are taken in the kinetic-controlled region, i.e. close to the onset potential.

**Table S1:** BET Surface area measurement for all the three catalysts.

| Compound | BET S.A (m <sup>2</sup> g <sup>-1</sup> ) | Pore size (nm) | Pore Volume (cm <sup>3</sup> g <sup>-1</sup> ) |
|----------|-------------------------------------------|----------------|------------------------------------------------|
| GO       | 25.8                                      | 15.0           | 0.10                                           |
| B-rGO    | 51.3                                      | 12.3           | 0.16                                           |
| N-rGO    | 187.1                                     | 21.1           | 0.99                                           |
| B&N-rGO  | 100.5                                     | 15.6           | 0.39                                           |

**Table S2:** The onset potentials of all the three compounds studied.

| Loading density (mg cm <sup>-2</sup> ) | Onset potential vs. RHE (V)* |       |         |
|----------------------------------------|------------------------------|-------|---------|
|                                        | N-rGO                        | B-rGO | B&N-rGO |
| 0.1                                    | 0.736                        | 0.742 | 0.765   |
| 0.2                                    | 0.762                        | 0.789 | 0.79    |
| 0.3                                    | 0.797                        | 0.803 | 0.803   |
| 0.4                                    | 0.813                        | 0.806 | 0.842   |
| 0.5                                    | 0.827                        | 0.804 | 0.843   |

\*the onset potential is the potential at which the current reaches 0.1 mA cm<sup>-2</sup>.

**Table S3:** Tafel slopes for the compounds studied in this work

| Compounds | Tafel slope (mV dec <sup>-1</sup> ) |
|-----------|-------------------------------------|
| B-rGO     | 66.8                                |
| N-rGO     | 71.9                                |
| B&N-rGO   | 61.8                                |

## Damjanovic model

The kinetics of the ORR was studied using the Damjanovic model shown below

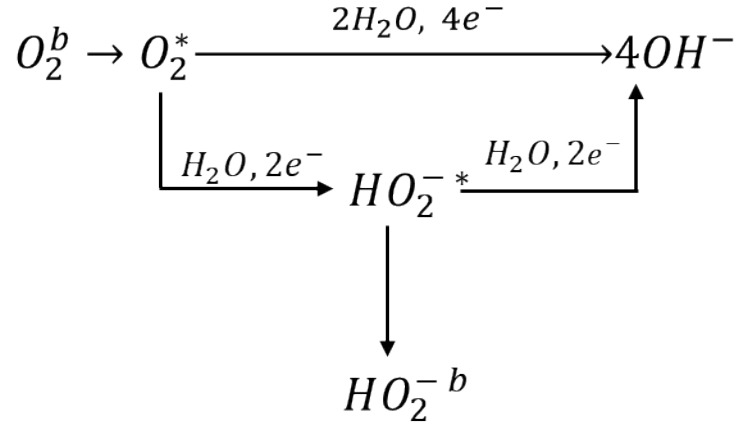

**Scheme S1.** Kinetic model for the ORR proposed by Damjanovic et al.  $b$  and  $*$  refers the bulk and surface concentrations, respectively. The direct pathway is the reduction of  $O_2$  to  $H_2O$  by 4-electron. The stepwise reduction of  $O_2$  to  $H_2O_2$  by 2e ( $k_2$ ) followed by the reduction of  $H_2O_2$  to  $H_2O$  by 2e ( $k_3$ ).

The number of electron ( $n$ ) and the percentage of  $H_2O_2$  estimated using the disk and ring currents from the rotating ring-disk electrode voltammetry. The equations are as shown below

$$n = \frac{4I_D}{I_D + \frac{I_R}{N}} \quad \text{and} \quad \%H_2O_2 = \frac{200 \frac{I_R}{N}}{I_D + \frac{I_R}{N}}$$

From the mass balanced equations of the above kinetic model gives rise to the linear relations between  $I_D/I_R$  and  $I_{DL}/(I_{DL}-I_D)$  and inverse square root of rotational speeds as shown below

$$\frac{I_D}{I_R} = \frac{1 + \frac{2k_1}{k_2}}{N} + \frac{2\left(1 + \frac{k_1}{k_2}\right)}{NZ_2} k_3 \omega^{-\frac{1}{2}} \quad \text{and} \quad \frac{I_{DL}}{I_{DL} - I_D} = 1 + \frac{k_1 + k_2}{Z_1} \omega^{-\frac{1}{2}}$$

where,  $I_D$  – Disk current (A)

$I_R$  – Ring current (A)

$I_{DL}$  – Limiting current density (A)

$N$  – Collection efficiency (0.37)

$\omega$  – Rotational speed ( $s^{-1}$ )

$k_1, k_2$  and  $k_3$  – Rate constants (as explained in the Scheme S1).

$$Z_1 = 0.62D_{O_2}^{2/3} \nu^{-1/6}$$

$$Z_2 = 0.62D_{H_2O_2}^{2/3} \nu^{-1/6}$$

$D_{O_2}$  – Diffusion coefficient of  $O_2$  at 0.1 M KOH ( $1.9 \times 10^{-5} \text{ cm}^2 \text{ s}^{-1}$ )

$D_{H_2O_2}$  – Diffusion coefficient of  $H_2O_2$  at 0.1 M KOH ( $1.27 \times 10^{-5} \text{ cm}^2 \text{ s}^{-1}$ )

$\nu$  – kinematic viscosity ( $0.01 \text{ cm}^2 \text{ s}^{-1}$ )

The slopes and intercept of the plots  $\frac{I_D}{I_R} \text{ vs. } \omega^{-\frac{1}{2}}$  and  $\frac{I_{DL}}{I_{DL} - I_D} \text{ vs. } \omega^{-\frac{1}{2}}$  from the above equations are given below

$$I_1 = \frac{1 + \frac{2k_1}{k_2}}{N}, \quad S_1 = \frac{2\left(1 + \frac{k_1}{k_2}\right)}{NZ_2} k_3 \quad \text{and} \quad S_2 = \frac{k_1 + k_2}{Z_1}$$

where,  $I_1$  – intercept of  $\frac{I_D}{I_R} \text{ vs. } \omega^{-\frac{1}{2}}$  plot

$S_1$  – slope of  $\frac{I_D}{I_R}$  vs.  $\omega^{\frac{-1}{2}}$  plot

$S_2$  – slope of  $\frac{I_{DL}}{I_{DL} - I_D}$  vs.  $\omega^{\frac{-1}{2}}$  plot
